# Supplementary material for: Level of play and coach-rated game intelligence are related to performance on design fluency in elite soccer players
Source: PubMed Central journal article supplement (PMC7316809; doi:10.1038/s41598-020-66180-w), 2020-06-25
Supplement: 41598_2020_66180_MOESM1_ESM.pdf [file 41598_2020_66180_MOESM1_ESM.pdf]

## **Supplementary information**

### **Level of play and coach-rated game intelligence are related to performance on design fluency in elite soccer players**

Vestberg T, Jafari R, Almeida R, Maurex L, Ingvar M, Petrovic P

Department of Clinical Neuroscience, Karolinska Institutet, Stockholm, Sweden

e-mail: [predrag.petrovic@ki.se](mailto:predrag.petrovic@ki.se)

**Supplementary Table 1.** ANCOVA assessing whether there was a significant difference between *DF Total Correct* results of NTP and PLP when correcting for 1) CS processing-speed, 2) CS working memory accuracy, 3) sex and 4) age. We checked that the model assumptions were met using Levene's test of equality of residual variances ( $p = 0.086$ ) and Shapiro-Wilk test for normality of the residuals ( $p = 0.85$ ).

| Source                            | df       | F           | Sig.         |
|-----------------------------------|----------|-------------|--------------|
| Sex                               | 1        | 5.18        | 0.028        |
| <b>NTP vs. PLP</b>                | <b>1</b> | <b>5.96</b> | <b>0.019</b> |
| Age                               | 1        | 0.09        | 0.765        |
| <i>CS Processing Speed</i>        | 1        | 3.63        | 0.063        |
| <i>CS Working Memory Accuracy</i> | 1        | 1.49        | 0.228        |

### Exploratory tests of CS and other D-KEFS measurements

**Supplementary Table 2.** CS tasks - mean normalized results for NTP.

*One-Sample Statistics NTP*

|                                   | N  | Mean   | Std. Deviation |
|-----------------------------------|----|--------|----------------|
| <i>CS Processing speed</i>        | 23 | 104.66 | 5.09           |
| <i>CS Attention</i>               | 23 | 108.93 | 4.62           |
| <i>CS Learning</i>                | 23 | 103.80 | 9.06           |
| <i>CS Working Memory Speed</i>    | 23 | 104.10 | 6.76           |
| <i>CS Working Memory Accuracy</i> | 23 | 106.01 | 6.45           |

**Supplementary Table 3.** One-sample t-test assessing whether CS results of NTP were significantly different from the norm (i.e. 100).

*One-Sample Test NTP*

|                                   | Test Value = 100 |    |       |                 |
|-----------------------------------|------------------|----|-------|-----------------|
|                                   | t                | df | Sig.  | Mean Difference |
| <i>CS Processing Speed</i>        | 4.39             | 22 | 0.001 | 4.66            |
| <i>CS Attention</i>               | 9.28             | 22 | 0.001 | 8.93            |
| <i>CS Learning</i>                | 2.01             | 22 | 0.057 | 3.80            |
| <i>CS Working Memory Speed</i>    | 2.91             | 22 | 0.008 | 4.10            |
| <i>CS Working Memory Accuracy</i> | 4.47             | 22 | 0.001 | 6.01            |

**Supplementary Table 4.** CS tasks- average normalized results for PLP.

*One-Sample Statistics PLP*

|                                   | N  | Mean   | Std. Deviation |
|-----------------------------------|----|--------|----------------|
| <i>CS Processing Speed</i>        | 28 | 107.12 | 4.96           |
| <i>CS Attention</i>               | 28 | 108.71 | 3.29           |
| <i>CS Learning</i>                | 28 | 104.90 | 8.61           |
| <i>CS Working Memory Speed</i>    | 28 | 104.78 | 6.73           |
| <i>CS Working Memory Accuracy</i> | 28 | 104.37 | 14.53          |

**Supplementary Table 5.** One-sample t-test assessing whether CS results of PLP were significantly different from the norm (i.e. 100).

*One-Sample Test PLP*

|                                   | Test Value = 100 |    |       |                 |
|-----------------------------------|------------------|----|-------|-----------------|
|                                   | t                | df | Sig.  | Mean Difference |
| <i>CS Processing Speed</i>        | 7.61             | 27 | 0.001 | 7.12            |
| <i>CS Attention</i>               | 13.99            | 27 | 0.001 | 8.71            |
| <i>CS Learning</i>                | 3.01             | 27 | 0.006 | 4.90            |
| <i>CS Working Memory Speed</i>    | 3.76             | 27 | 0.001 | 4.78            |
| <i>CS Working Memory Accuracy</i> | 1.59             | 27 | 0.123 | 4.37            |

**Supplementary Table 6.** D-KEFS tasks CWI and TMT - average normalized results for NTP.

*One-Sample Statistics National Team Players*

|                | N  | Mean  | Std. Deviation |
|----------------|----|-------|----------------|
| <i>CWI 3</i>   | 23 | 12.13 | 2.28           |
| <i>CWI 4</i>   | 23 | 12.30 | 1.66           |
| <i>TMT 2-3</i> | 23 | 13.78 | 1.68           |
| <i>TMT 4</i>   | 23 | 12.17 | 1.40           |

**Supplementary Table 7.** One-sample t-test for assessing whether *CWI* and *TMT* results of NTP were significantly different from the norm (i.e. 100).

*One-Sample Test National Team Players*

|                | Test Value = 10 |    |       |                 |
|----------------|-----------------|----|-------|-----------------|
|                | t               | df | Sig.  | Mean Difference |
| <i>CWI 3</i>   | 4.48            | 22 | 0.001 | 2.13            |
| <i>CWI 4</i>   | 6.64            | 22 | 0.001 | 2.30            |
| <i>TMT 2-3</i> | 10.81           | 22 | 0.001 | 3.78            |
| <i>TMT 4</i>   | 7.43            | 22 | 0.001 | 2.17            |

**Supplementary Table 8.** *D-KEFS* tasks *CWI* and *TMT* - average normalized results for PLP.

*One-Sample Statistics Premier League Players*

|                | N  | Mean  | Std. Deviation |
|----------------|----|-------|----------------|
| <i>CWI 3</i>   | 28 | 10.89 | 2.57           |
| <i>CWI 4</i>   | 28 | 10.89 | 2.28           |
| <i>TMT 2-3</i> | 28 | 13.11 | 1.97           |
| <i>TMT 4</i>   | 28 | 11.54 | 1.62           |

**Supplementary Table 9.** One-sample t-test for assessing whether *CWI* and *TMT* results of PLP were significantly different from the norm (i.e. 100).

*One-Sample Test Premier League Players*

|                | Test Value = 10 |    |       |                 |
|----------------|-----------------|----|-------|-----------------|
|                | t               | df | Sig.  | Mean Difference |
| <i>CWI 3</i>   | 1.84            | 27 | 0.077 | 0.89            |
| <i>CWI 4</i>   | 2.07            | 27 | 0.048 | 0.89            |
| <i>TMT 2-3</i> | 8.35            | 27 | 0.001 | 3.11            |
| <i>TMT 4</i>   | 5.01            | 27 | 0.001 | 1.54            |

**Supplementary Table 10.** Independent sample t-test assessing whether there was a significant difference between *CWI*, *TMT* and CS results of NTP and PLP.

*Independent Samples Test*

|                                   | Levene's Test for Equality of Variances |              | t-test for Equality of Means |           |              |                 |
|-----------------------------------|-----------------------------------------|--------------|------------------------------|-----------|--------------|-----------------|
|                                   | F                                       | Sig.         | t                            | df        | Sig.         | Mean Difference |
| <i>CWI 3</i>                      | 0.25                                    | 0.621        | 1.80                         | 49        | 0.078        | 1.24            |
| <b><i>CWI 4</i></b>               | <b>1.55</b>                             | <b>0.219</b> | <b>2.47</b>                  | <b>49</b> | <b>0.017</b> | <b>1.41</b>     |
| <i>TMT 2-3</i>                    | 0.003                                   | 0.958        | 1.30                         | 49        | 0.199        | 0.68            |
| <i>TMT 4</i>                      | 0.98                                    | 0.328        | 1.49                         | 49        | 0.144        | 0.64            |
| <i>CS Processing Speed</i>        | 0.00                                    | 0.994        | -1.75                        | 49        | 0.087        | -2.47           |
| <i>CS Attention</i>               | 2.90                                    | 0.095        | 0.20                         | 49        | 0.844        | 0.22            |
| <i>CS Learning</i>                | 0.09                                    | 0.765        | -0.44                        | 49        | 0.658        | -1.10           |
| <i>CS Working Memory Speed</i>    | 0.009                                   | 0.924        | -0.36                        | 49        | 0.721        | -0.68           |
| <i>CS Working Memory Accuracy</i> | 1.73                                    | 0.195        | 0.50                         | 49        | 0.618        | 1.64            |

**Supplementary Table 11.**

Correlation between rated game *intelligence* vs WM (*Working memory / Learning*) and Stroop tasks (*CWI 3* and *4*)

*Pearson correlation*

|                                   | <i>r</i> | Sig.            |
|-----------------------------------|----------|-----------------|
| <i>CS Working Memory Accuracy</i> | 0.19     | <i>p</i> =0.185 |
| <i>CS Learning</i>                | 0.12     | <i>p</i> =0.382 |
| <i>CWI 3</i>                      | 0.18     | <i>p</i> =0.216 |
| <i>CWI 4</i>                      | 0.16     | <i>p</i> =0.246 |
